# Supplementary material for: Oligodendrogenesis increases in hippocampal grey and white matter prior to locomotor or memory impairment in an adult mouse model of tauopathy
Source: PubMed Central journal article supplement (PMC8451881; doi:10.1111/ejn.14726), 2020-04-14
Supplement: EJN-54-5762-s001.pdf [file EJN-54-5762-s001.pdf]

## Supplementary Material

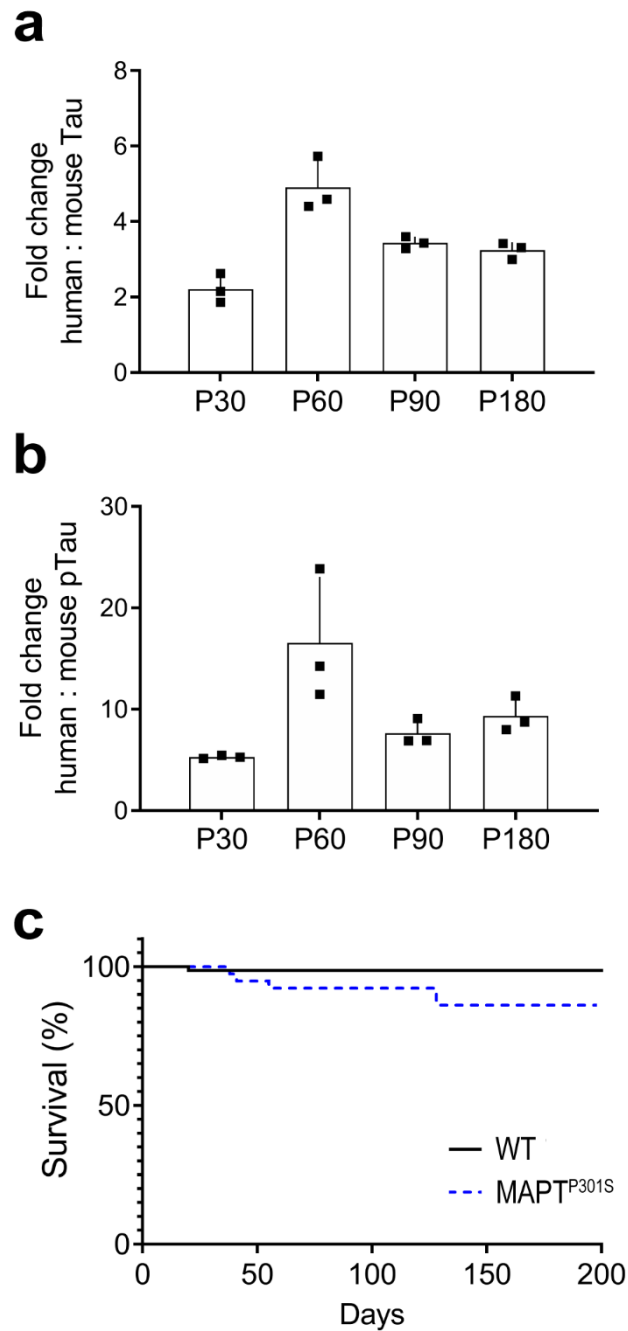

**Figure S1. Human tau protein expression is 2 to 5-fold higher than endogenous mouse tau in *MAPT<sup>P301S</sup>* mice**

**a)** Fold change between human tau and mouse tau in *MAPT<sup>P301S</sup>* mice at P30, P60, P90 and P180. **b)** Fold change between human phosphorylated tau and mouse phosphorylated tau in *MAPT<sup>P301S</sup>* mice at P30, P60, P90 and P180. Results are presented as mean  $\pm$  SD,  $n = 3$  mice per genotype. **c)** 86% of *MAPT<sup>P301S</sup>* mice ( $n = 39$ ) survived to P200 against 98% of WT mice ( $n = 73$ ). Survival curves comparison: Log-Rank (Mantel-Cox),  $p = 0.0390$ .

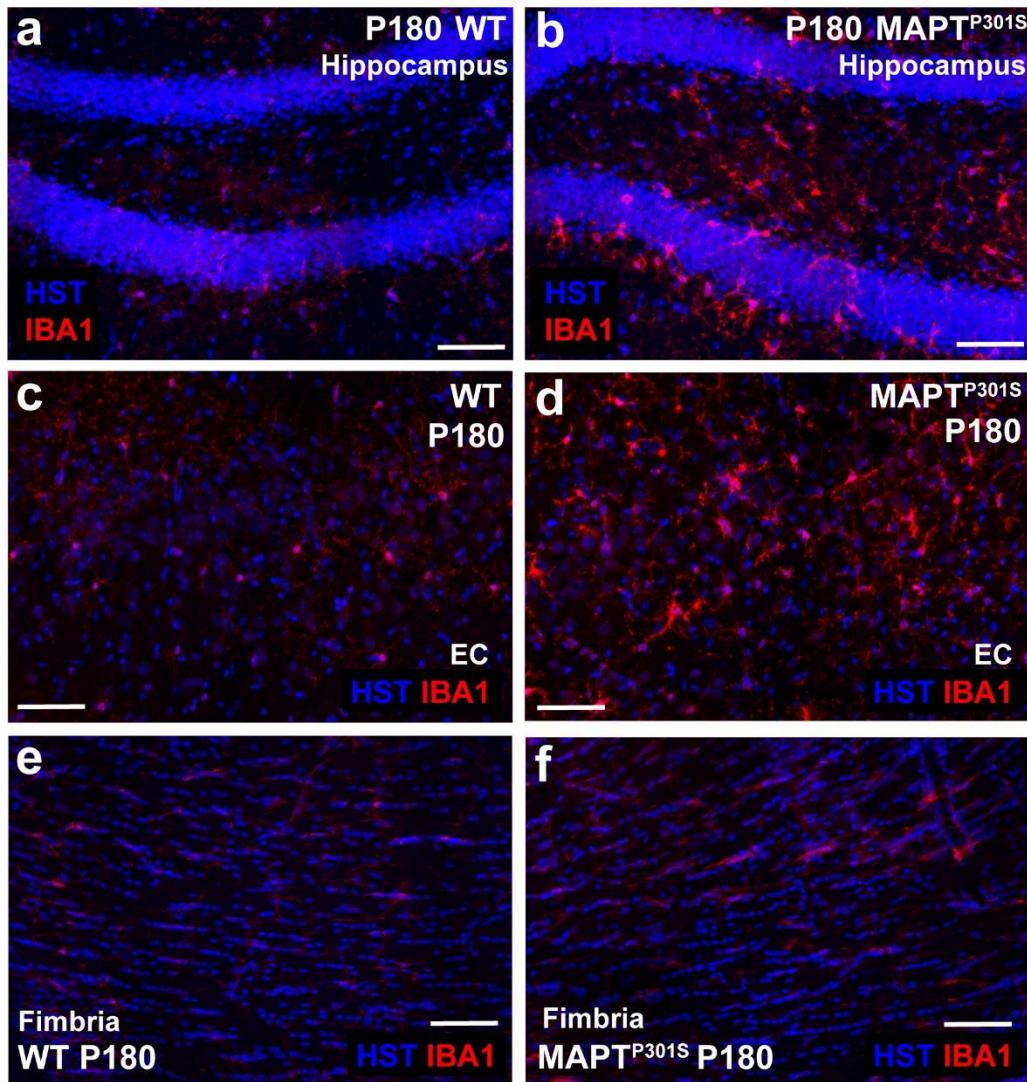

**Figure S2. Reactive microglia are visible in *MAPT*<sup>P301S</sup> mice at P180**

**a-f)** Representative confocal images of Iba1 (red) and Hoechst 33342 (blue) in the hippocampus (**a-b**), entorhinal cortex (EC; **c-d**) and fimbria (**e-f**) of wildtype (**a, c, e**) and *MAPT*<sup>P301S</sup> (**b, d, f**) mice at P180. Scale bars represent 60 $\mu$ m.

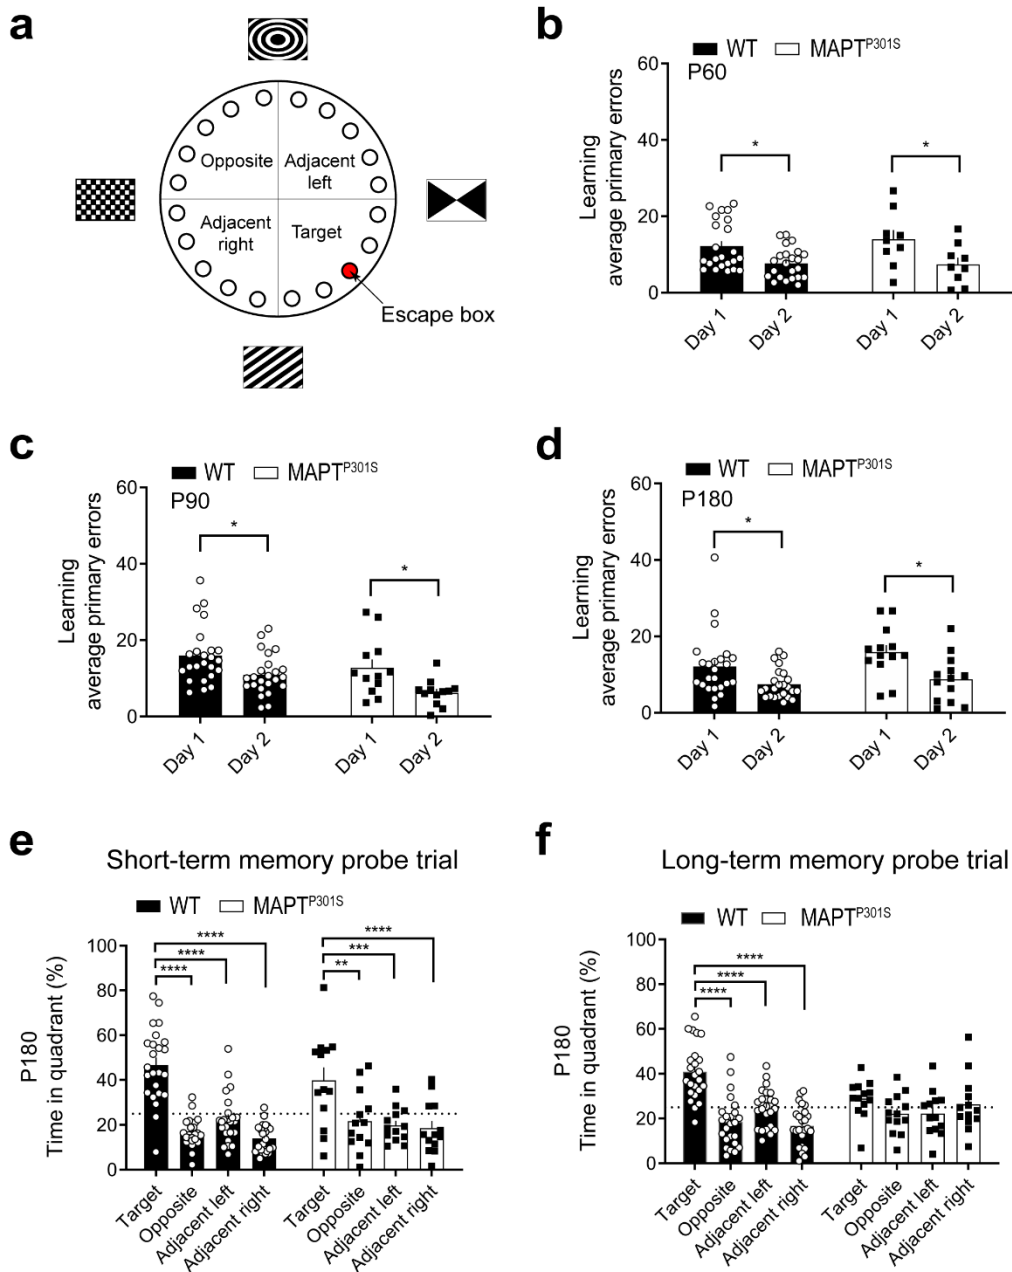

**Figure S3. Learning and memory performance in the Barnes maze**

**a**) Schematic diagram of the Barnes maze depicting the location of the escape box (red) relative to the spatial cues surrounding the maze and quadrant divisions. **b**) Quantification of the average number primary errors committed by P60 WT (open circles, black bars) and *MAPT*<sup>P301S</sup> (black squares, open bars) mice during the first and second day of learning [two-way ANOVA, genotype:  $F(1, 60) = 0.24$ ,  $p = 0.6233$ ; learning day:  $F(1, 60) = 12.46$ ,  $p = 0.0008$ ; interaction:  $F(1, 60) = 0.39$ ,  $p = 0.5307$ ]. **c**) Quantification of the average number primary errors committed by P90 WT and *MAPT*<sup>P301S</sup> mice during the first and second day of learning [two-way ANOVA, genotype:  $F(1, 68) = 6.30$ ,  $p = 0.0144$ ; learning day:  $F(1, 68) = 13.37$ ,  $p = 0.0005$ ; interaction:  $F(1, 68) = 0.25$ ,  $p = 0.6166$ ]. **d**) Quantification of the average number primary errors committed by P180 WT and *MAPT*<sup>P301S</sup> mice during the first and second day of learning [two-way ANOVA, genotype:  $F(1, 70) = 2.569$ ,  $p = 0.1135$ ; learning day:  $F(1, 70) = 13.91$ ,  $p = 0.0004$ ; interaction:  $F(1, 70) = 0.5959$ ,  $p = 0.4428$ ]. **e**) Quantification of the time spent

by P180 WT and *MAPT<sup>P301S</sup>* mice in each quadrant of the maze during the short-term memory probe phase [two-way ANOVA, genotype:  $F(1, 140) = 6.558e-006$ ,  $p = 0.9980$ ; maze quadrant:  $F(3, 140) = 35.37$ ,  $p < 0.0001$ ; interaction:  $F(3, 140) = 1.959$ ,  $p = 0.1230$ ]. **f**) Quantification of the time spent by P180 WT and *MAPT<sup>P301S</sup>* mice in each quadrant of the maze during the long-term memory probe phase [two-way ANOVA, genotype:  $F(1, 140) = 0.033$ ,  $p = 0.8550$ ; maze quadrant:  $F(3, 140) = 14.14$ ,  $p < 0.0001$ ; interaction:  $F(3, 140) = 6.737$ ,  $p = 0.0003$ ]. Data are presented as mean  $\pm$  SEM, n= 13-24 mice per group.

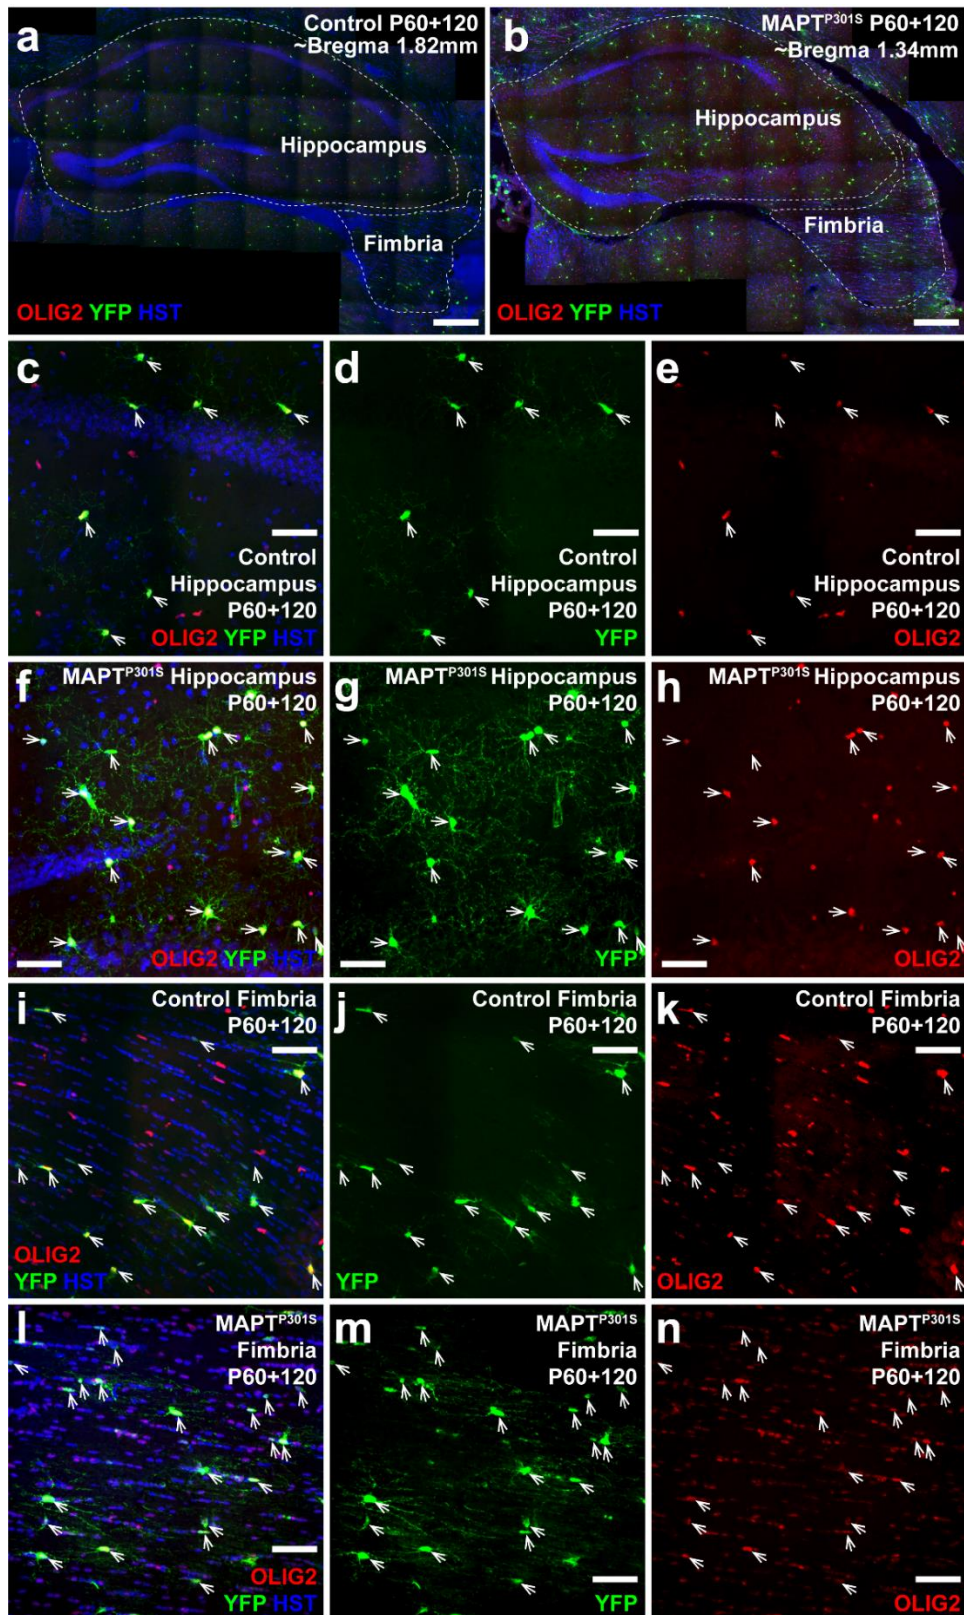

**Figure S4. Essentially all YFP<sup>+</sup> cells express OLIG2 in P60+120 control and *MAPT*<sup>P301S</sup> mice**

**a-b)** Low magnification confocal image showing the hippocampus and fimbria in coronal brain cryosections from P60+120 control and *MAPT*<sup>P301S</sup> transgenic mice stained to detect YFP (green), OLIG2 (red) and Hoechst 33342

(blue). **c-e**) Confocal image of the hippocampus in coronal brain cryosections from P60+120 control mice stained to detect YFP (green), OLIG2 (red) and Hoechst 33342 (blue). **f-h**) Confocal image of the hippocampus in coronal brain cryosections from P60+120 *MAPT<sup>P301S</sup>* transgenic mice stained to detect YFP (green), OLIG2 (red) and Hoechst 33342 (blue). **i-k**) Confocal image of the fimbria in coronal brain cryosections from P60+120 control mice stained to detect YFP (green), OLIG2 (red) and Hoechst 33342 (blue). **l-n**) Confocal image of the fimbria in coronal brain cryosections from P60+120 *MAPT<sup>P301S</sup>* mice stained to detect YFP (green), OLIG2 (red) and Hoechst 33342 (blue). White arrows indicate YFP<sup>+</sup> OLIG2<sup>+</sup> cells. Scale bar represents 280  $\mu$ m (a-b), 50  $\mu$ m (c-h), or 25  $\mu$ m (i-k).

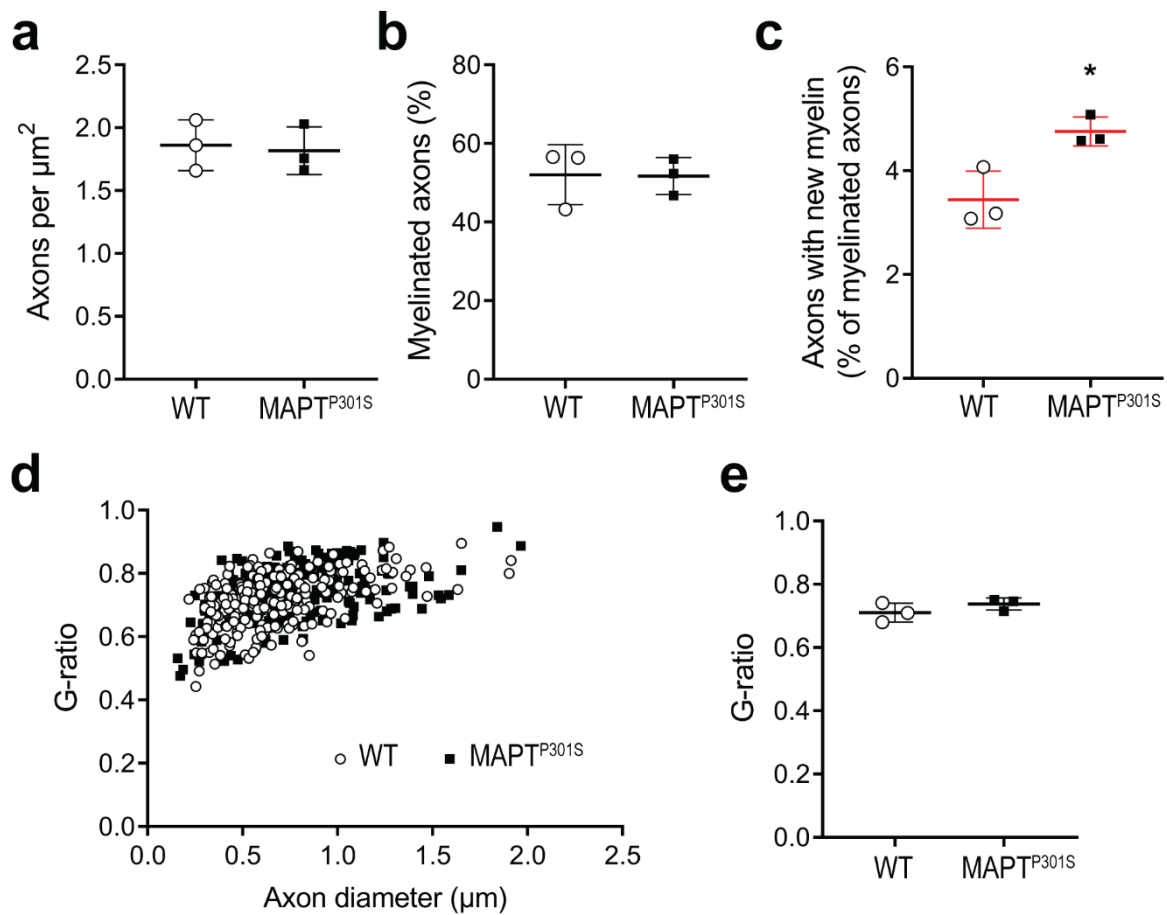

**Figure S5. The proportion of newly myelinated axons is increased in the fimbria of P180 *MAPT*<sup>P301S</sup> mice**

**a)** Quantification of axon density (axons /  $\mu\text{m}^2$ ) in the fimbria of P180 WT (open circles) and *MAPT*<sup>P301S</sup> (black squares) mice (two-tailed t-test,  $t = 0.2750$ ,  $df = 4$ ,  $p = 0.7970$ ). **d)** Quantification of the proportion of myelinated axons in the CA1 of WT and *MAPT*<sup>P301S</sup> mice at P180 (two-tailed t-test,  $t = 0.0635$ ,  $df = 4$ ,  $p = 0.9524$ ). **e)** Quantification of the proportion of myelinated axons ensheathed by immature (new) myelin (two-tailed t-test,  $t = 3.695$ ,  $df = 4$ ,  $p = 0.0209$ ). **f)** Graphical representation of the g-ratio distribution based on axon diameter (Simple linear regression analysis, slope  $F(1, 524) = 1.735$ ,  $p = 0.1884$ , Y intercept  $F(1, 525) = 5.422$ ,  $p = 0.0203$ ,  $n = 64 - 109$  myelinated axons per mouse). **g)** Quantification of average g-ratio per animal in WT and *MAPT*<sup>P301S</sup> mice at P180 (two-tailed t-test,  $t = 1.324$ ,  $df = 4$ ,  $p = 0.2562$ ).  $n = 3$  animals per genotype.
